# Supplementary material
Source: PubMed Central journal article supplement (PMC4445618)
Supplement: mt2014215x1.pdf [file mt2014215x1.pdf]

## Supplementary Text and Figures

### Cell culture

The human embryonic kidney 293T and Phoenix-Amp cell lines, both used to package retroviruses carrying RNA encoding TCR $\alpha\beta$ , were grown in DMEM with 10% Fetal Bovine Serum (FBS; Greiner Bio-one Alphen a/d Rijn, The Netherlands), 200nM L-glutamine, 1% MEM non-essential amino acids and antibiotics. The mouse melanoma B16BL6 (B16WT) clone (selected for high TRP2 expression) and cell line, B16:A2-YLEP clone and cell-line, and other B16 cell lines expressing gp100 antigen variants, as well as tumor cells isolated from *in vivo* tumors were cultured using the same medium. Mouse splenocytes as well as TILs (the latter starting from single tumor cell suspensions) were cultured in mouse T cell medium consisting of RPMI 1640 medium supplemented with 25 mM HEPES, 200 nM L-glutamine, 10% FBS, 1% MEM non-essential amino acids, 1 mM sodium pyruvate, 50  $\mu$ M  $\beta$ -mercaptoethanol, antibiotics and 50 IU/ml human rIL-2 (Proleukin; Chiron, Amsterdam, The Netherlands).

### Mice

The HLA-A2 transgenic (tg) mice (kindly provided by prof. François Lemonnier, Paris, France), are  $\beta$ 2m<sup>-/-</sup> and H-2D<sup>b</sup><sup>-/-</sup> and express a chimeric HLA-A\*0201 transgene (HHD, referred to as HLA-A2) composed of human  $\beta$ 2m, the  $\alpha$ 1 and  $\alpha$ 2 domains of HLA-A\*0201 and the  $\alpha$ 3 domain of H-2D<sup>b</sup> (1). Inbred C57BL6 (B6) mice were purchased from Harlan Laboratories (Hillcrest, UK). Experiments were approved by the Experimental Animal Committee of the Erasmus MC Cancer Institute and carried out in accordance with institutional and national guidelines.

### TCR and antigen constructs

#### *Making of constructs*

TCR $\alpha$  and  $\beta$  genes specific for human glycoprotein 100 (gp100<sub>280-288</sub>) peptide (YLEPGPVTA) presented by HLA-A2 (gp100/A2) were derived from CTL-296 clone as described earlier (2).

Gp100/A2-specific TCR $\alpha$  and  $\beta$  genes were murinized as described previously (3), codon optimized (GeneArt, Regensburg, Germany) and cloned separately in pBullet retroviral vector (4) (vectors are abbreviated as pB:TCR $\alpha$ + $\beta$  and pB:optTCR $\alpha$ + $\beta$ ). In addition, the codon optimized gp100/A2 TCR genes were cloned into the pMP71 vector (kindly provided by prof. Wolfgang Uckert, Max-Delbrück Center, Berlin, Germany) with TCR $\alpha$  and  $\beta$  genes separated by an optimized T2A ribosome skipping sequence (abbreviated as pMP71:opt TCR  $\beta$ -T2A- $\alpha$ ). TCR $\alpha$  and  $\beta$  genes specific for mouse tyrosinase-related protein-2 (TRP2<sub>180-188</sub>) peptide (SVYDFVWL) presented by H2-K<sup>b</sup> (TRP2/H2-K<sup>b</sup>) were derived from CTL-LP9 clone (5) as described earlier (6). In short, our laboratory obtained TCR-V DNAs by 5' RACE and identified the full length TCR $\alpha$  and  $\beta$  genes according to [www.imgt.org](http://www.imgt.org): TRAV12N-3/J31/C and TRBV26/D1/J2-7/C2. TCR sequences were cysteine modified (according to (7)) codon optimized and cloned into the pMX vector with TCR $\alpha$  and  $\beta$  genes separated by a P2A sequence (abbreviated as pMX:opt TCR $\beta$ cys-P2A-TCR $\alpha$ cys, and kindly provided by prof. Ton Schumacher, NKI-AvL, Amsterdam, the Netherlands). The A2-YLEP antigen gene was a fusion between HHD (kindly provided by prof. Francois Lemonnier) and the gp100 peptide (YLEPGPVTA). This antigen gene was obtained by inserting DNA that covered the leader sequence of HLA-A2, the gp100 peptide sequence and a (G<sub>4</sub>S)<sub>3</sub> linker and was flanked by *Eco*RI sites (synthesized by GeneArt) into a pLXSN vector that already contained HHD (pLXSN:A2). HHD cDNA and human gp100 cDNA (kindly provided by prof. Gosse Adema, Nijmegen, The Netherlands) were subcloned as *Xho*I fragments into the retroviral vectors pLXSN and pLXSH, respectively (Clontech Laboratories Inc., Mountain View, CA) (pLXSN:A2 and pLXSH:gp100). We obtained a pLXSH:gp100AV variant containing an altered gp100 peptide ligand with improved HLA-A2 binding (8) by replacing the anchor alanine residue by a valine by site-directed mutagenesis (QuikChange II kit, Stratagene, Cedar Creek, TX). All TCR and antigen inserts, once cloned into retroviral vectors, were sequence verified (Service XS, Leiden, The Netherlands).

### *Retroviral transduction*

Total mouse splenocytes were isolated, activated with Concanavalin A and rhIL-2 in mouse T cell medium, and transduced with the retroviral supernatant as described by Pouw and colleagues (3). T cells were transduced with TCR genes or empty retroviral vector (TCR and Mock T cells, respectively). B16 cells were retrovirally transduced using a similar transduction protocol with the exception that GALV-pseudotyped viruses together with polybrene (4  $\mu$ g/ml) were used and cells were incubated with the retroviral supernatant for 24h, followed by a second incubation for 8h. B16:A2-YLEP cells (transgenes: pLXSN:A2-YLEP+pLXSH:gp100) were cultured with neomycin (1 mg/ml) (G418, Calbiochem, La Jolla, CA) and hygromycin (0.5 mg/ml, Clontech Laboratories). In addition to our standardly used B16:A2-YLEP cells, we have transduced B16 cells with pLXSN:A2-YLEP but not pLXSH:gp100 (B16A2-YLEP w/o gp100). B16:A2/gp100 (transgenes: pLXSN:A2+pLXSH:gp100) and B16:A2/gp100AV cells (transgenes: pLXSN:A2+pLXSH:gp100AV) were cultured in the presence of both neomycin and hygromycin.

#### *Validation of TCR and tumor antigen*

Expression of TCR genes and antigens was validated by standard flow cytometry using a FACSCalibur and CellQuest software (BD). Surface expression of TCR transgenes was detected with the following antibodies and reagents: FITC-labeled anti-TCR-V $\beta$ 27 mAb (gp100/A2 TCR, clone CAS1.1.3, Beckman Coulter, Marseille, France); gp100/A2K<sup>b</sup> PE-labeled tetramers (gp100/A2 pMHC generated according to (9)); FITC-labeled anti-TCR-V $\alpha$ 12N-3 mAb (TRP2/H2-K<sup>b</sup> TCR, clone B21.14; eBioscience, Hatfield, UK); and PE-labeled anti-TCR-V $\beta$ 26 mAb (TRP2/H2-K<sup>b</sup> TCR, clone KJ25; BD, Oxford, UK). Stainings for TCRs were performed in combination with PerCP-labeled anti-CD3 $\epsilon$  and APC-labeled anti-CD8 $\alpha$  mAbs. Expression of surface MHC class I molecules and intracellular antigens were detected with the following antibodies: FITC-labeled anti-HLA-A2; anti-human gp100 followed by 2<sup>nd</sup> step PE-labeled anti-mouse IgG; PE-labeled anti-H2-K<sup>b</sup>; and anti-mouse TRP2 followed by 2<sup>nd</sup> step PE-labeled anti-rabbit IgG (see Materials and Methods). Stainings for TCRs and antigens are exemplified in Figures S1A, S1B (gp100/A2) and S12A (TRP2/H2-K<sup>b</sup>). For most

*in vivo* experiments, B16:A2-YLEP cells were single-cell sorted for high HLA-A2 expressing cells on a FACS Aria cell sorter using the anti-HLA-A2 antibody, and B16WT cells were single-cell sorted for high mouse TRP2 expressing cells. TCR T cells were functionally validated by IFN $\gamma$  production after 20h co-cultivation with B16 tumor cells using ELISA measurements in supernatants (see Materials and Methods) (Figures S1C and S12A). We observed that among the various gp100/A2 TCR and antigen constructs the pMP71:opt TCR  $\beta$ -T2A- $\alpha$  transduced T cells and B16:A2-YLEP cells were most optimal according to surface expression of transgene, *in vitro* T cell function and *in vivo* growth kinetics of antigen-positive B16 tumor cells (see Figure S1), and were used for *in vivo* adoptive T cell transfer experiments.

## **Adoptive T cell therapy**

### *Conditioning with Busulphan and Cyclophosphamide*

HLA-A2 tg mice were conditioned at day -3 prior to tumor transplant as described for the curative model in Materials and Methods. At day 4 after start of treatment with chemotherapeutic drugs, blood was drawn from conditioned and unconditioned control mice. Following lysis of erythrocytes with NH $_4$ Cl absolute cell numbers of lymphocyte subsets were determined using Flow-Count Fluorospheres (Beckman Coulter). Cells were stained with the following mAbs: CD3 $\epsilon$ -PerCP (clone 145-2C11), CD8-APC (clone 53-6.7), CD4-FITC (clone L3T4), CD19-PE (clone 1D3), NK1.1-PE (clone PK136) and CD11c-APC (clone HL3) (all BD Pharmingen, San Diego, CA) and analyzed by flow cytometry (see Figure S2).

### *Tumor prevention model*

HLA-A2 tg mice were conditioned as mentioned above, and at day 0 mice were injected s.c. with  $0.5 \times 10^6$  B16:A2-YLEP cells, followed at day 1 with injection of 2.5, 7.5 or  $20 \times 10^6$  TCR or  $20 \times 10^6$  Mock T cells i.v. in a volume of 100 $\mu$ l. Numbers of TCR T cells reflect T cells that specifically bind gp100/A2 pMHC, which covered 70-80 % of total T cells injected. T cell injection was followed by injections of IL-2 ( $1 \times 10^5$  IU per dose) s.c. on 4 consecutive days (days 1-4) (Figure S3).



### *Tumor curative model*

See Materials and Methods for a description of the tumor curative model.

### *Tumor growth*

Tumor growth was measured by caliper 3 times a week and tumor volumes were estimated with the formula  $0.4 \times (A \times B^2)$  where A represents the largest diameter and B the diameter perpendicular to A (10). Animals were sacrificed once the tumor was ulcerated, the largest diameter reached 20 mm or there was > 20% loss in body weight.

## **Analyses of T cells following T cell therapy**

### *T cell persistence and memory*

Peripheral blood was drawn at day 4 after T cell transfer and at weekly intervals thereafter. Absolute T cell counts were determined using Flow-Count Fluorospheres. TCR T cells were monitored as described above (see *Validation of TCR*). To detect low frequencies of memory TCR T cells, mice that remained tumor-free for > 90 days after the first tumor challenge (in prevention model) were re-challenged with  $0.5 \times 10^6$  B16:A2-YLEP cells. Spleens from mice that again remained tumor-free for > 90 days were isolated and amplified for 5 days in the presence of gp100 peptide (0.005  $\mu$ g/ml) starting at  $2.5 \times 10^6$  cells/ml in mouse T cell medium supplemented with 20 IU/ml IL-2. Spleens from mice that remained tumor-free after tumor regression (i.e. no macroscopic tumor) for > 75 days (in curative model) underwent similar procedures. T cells were harvested and stained with gp100/A2 pMHC, anti-CD3 $\epsilon$ , anti-CD8 $\alpha$ , APC-labeled anti-CD44 (clone IM7) and FITC-labeled anti-CD62L mAbs (clone MEL-14) (all mAb from BD). In addition, T cells were stimulated O/N with B16WT and B16:A2-YLEP tumor cells in the presence of Golgi Plug (according to manufacturer instructions, BD), stained with anti-CD8 $\alpha$  mAb, permeabilized and stained with PE-labeled anti-IFN $\gamma$  mAb (clone XMG1.2, BD). All samples were analyzed on a FACSCalibur using CellQuest software.

### *T cell responses against antigens other than gp100/A2*

Mice that were treated with gp100/A2 TCR T cells and cured were tested for endogenous T cell responses against epitopes other than gp100/A2. To this end, splenocytes ( $2 \times 10^6$ ) were co-cultured with irradiated (160Gy) B16:A2-YLEP tumor cells ( $1 \times 10^6$ ) in a total volume of 1 ml mouse T cell medium supplemented with 20 IU/ml IL-2 per well in a 24 well plate. After 5-7 days of T cell amplification, cells were analyzed for pMHC binding and IFN $\gamma$  production in response to B16:A2-YLEP and B16WT by flow cytometry (see also legend to Figure S7).

### **Analyses of tumors following T cell therapy**

#### *Antigen mRNA and genomic DNA*

Tumor RNA and DNA were purified with use of silica-based membranes (Mini kits, Qiagen, Valencia, CA). Quantitative PCRs were performed to assess levels of antigen mRNA and genomic antigen DNA. Levels were calculated using the formula  $2^{-\Delta C_T}$ , in which  $C_T$  is defined as the cycle number at which the amplified fluorescence signal crosses a pre-set threshold and  $\Delta C_T$  is defined as the difference between the  $C_T$  value of the A2-YLEP gene and that of an endogenous reference gene, namely mouse TRP2. Sequences of primers and probes used to quantify levels of A2-YLEP and A2 DNAs are provided in Figure S9. Sequences of primers and probe to quantify TRP2 DNA were: forward primer, 5'-TAATTGTGGAGGCTGCAAGTTC-3'; reverse primer, 5'-AGGATGGCCGGCTTCTTC-3'; and probe, FAM-5'-CTGGACCGGCCCGACTGTAATC-3' (Applied Biosystems, Foster City, CA). Detection was monitored with an MX3000P real-time PCR System using MX Pro data analysis (Stratagene, La Jolla, CA). For further analyses, retrovirally introduced antigen transgenes were amplified from tumor DNA (100 ng) using: the pLXSN forward primer, 5'-GCCTCCGCCTCCTTCTCCTCCATC-3'; the pLXSN reverse primer, 5'-GCTCAGAAGAACTCGTCAAGAAGG-3'; and Phusion High-Fidelity DNA polymerase (Thermo Scientific Finnzymes, Vantaa, Finland). PCR products were analyzed by gel electrophoresis and sequencing, which allowed the design of primers and probes and performance of quantitative PCRs to distinguish between antigen transgenes with or without the gp100 peptide sequence (see legend to Figure S10 for details).

### *Methylation of antigen promoter*

To assess the methylation status of antigen promoter, DNA was treated with sodium bisulphite (EZ DNA Methylation, Zymo research; Irvine, CA) according to the manufacturer's protocol. Methylation-specific PCR was performed on treated DNA using primers specific for either unmethylated (U) or methylated (M) DNA sequences of the 5' LTR promoter of the pLXSN provirus, upstream of the antigen gene. Primer sequences were: U forward primer, 5'-TGTGTTTTATTTGAATTAATTAATTAGTTT-3'; U reverse primer, 5'-CACAACTCTATCAAAAACTAACACC-3'; M forward primer, 5'-TTTTATTTGAATTAATTAATTAGTTCGT-3'; and M reverse primer, 5'-GCAATCTATCGAAAACTAACGC-3'.

### *Ex vivo treatment of tumor cells to up-regulate antigen expression*

Cultures of isolated tumor cells were either non-treated or subjected to one of the following *ex vivo* treatments prior to measurements of antigen expression by flow cytometry. Azacitidine (AZA) was added to the culture media at day 4 for 3 consecutive days (final concentration 2-10 $\mu$ M) (Sigma-Aldrich); mouse IFN $\gamma$  was added at day 5 (100 Units/ml) (Sanquin) and tumor cells were left untreated for another 48h; and tumor cells were cultured for extended periods of 14-21 days.

### *Functional antigen expression*

Cultures of isolated tumor cells were tested for their ability to induce IFN $\gamma$  production by TCR T cells. In addition, target cell lysis was measured with two types of assays. The WST-1 (Water Soluble Tetrazolium salts) assay was adapted from (11). In brief, tumor cells were seeded in flat-bottom 96-wells plates (1x10<sup>4</sup> per well in 200  $\mu$ l B16 culture medium) and incubated overnight at 37°C and 5% CO<sub>2</sub>. Next, 100  $\mu$ l supernatant was removed from the wells and TCR or Mock T cells were added (8x10<sup>4</sup> T cells per well in 50  $\mu$ l mouse T cell medium). Cells were left to incubate for 20h at 37°C and 5% CO<sub>2</sub>. In a last step, 50  $\mu$ l of 5x diluted WST-1 reagent (Roche, Basel, Switzerland) was added to each well and incubation was continued for 3h at 37°C and 5%CO<sub>2</sub>, after which absorbance was measured (450 nm).

Tumor cells only and a 1% triton solution were used to set 0 and 100% target cell killing, respectively. Absorbance of WST-1 reagent in medium (no cells) was used to determine background activity and subtracted from all data. Data was presented as % target cell killing, which was calculated as follows:

$$\% \text{ killing} = \frac{\text{Abs}^{\text{tumor cells only}} - \text{Abs}^{\text{Sample}}}{\text{Abs}^{\text{tumor cells only}} - \text{Abs}^{\text{Triton}}}$$

A standard  $^{51}\text{Cr}$ -release assay was performed as described previously (3).

#### *Genome-wide expression analysis*

RNA from collected tumors was purified with use of silica-based membranes (Mini kit, Qiagen) and subjected to genome-wide expression analysis using Illumina expression bead chips (ServiceXS, Leiden, The Netherlands). In short, RNA concentration was measured with a Nanodrop ND1000 spectrophotometer, and RNA quality and integrity were checked with an Agilent Bioanalyzer (Agilent Technologies, Palo Alto, CA). Two hundred ng total RNA was amplified and labeled with biotin-16-UTP (TotalPrep-96 RNA amplification kit). Biotinylated cRNA samples were hybridized onto Illumina MouseWG-6 v2 beads, after which beads were washed, stained and scanned with an iScan array scanner. Initial gene expression analysis and subsequent data processing and normalization were performed using Genomestudio v. 2011.1 and 'lumi' (12) packages, respectively. Normalized sample data were averaged and used to calculate signal differences between relapsed, regressed or progressed tumors, which, followed by log2 transformations, represented fold changes in gene expressions between the different tumor types.

## References

1. Pascolo S, *et al.* (1997) HLA-A2.1-restricted education and cytolytic activity of CD8(+) T lymphocytes from beta2 microglobulin (beta2m) HLA-A2.1 monochain transgenic H-2Db beta2m double knockout mice. *J Exp Med* 185(12):2043-2051.
2. Schaft N, *et al.* (2003) Peptide fine specificity of anti-glycoprotein 100 CTL is preserved following transfer of engineered TCR alpha beta genes into primary human T lymphocytes. *J Immunol* 170(4):2186-2194.
3. Pouw NM, Westerlaken EJ, Willemsen RA, & Debets R (2007) Gene transfer of human TCR in primary murine T cells is improved by pseudo-typing with amphotropic and ecotropic envelopes. *J Gene Med* 9(7):561-570.
4. Willemsen RA, *et al.* (2000) Grafting primary human T lymphocytes with cancer-specific chimeric single chain and two chain TCR. *Gene Ther* 7(16):1369-1377.
5. Schreurs MW, *et al.* (2000) Dendritic cells break tolerance and induce protective immunity against a melanocyte differentiation antigen in an autologous melanoma model. *Cancer Res* 60(24):6995-7001.
6. Bendle GM, *et al.* (2010) Lethal graft-versus-host disease in mouse models of T cell receptor gene therapy. *Nat Med* 16(5):565-570, 561p following 570.
7. Cohen CJ, Zhao Y, Zheng Z, Rosenberg SA, & Morgan RA (2006) Enhanced antitumor activity of murine-human hybrid T-cell receptor (TCR) in human lymphocytes is associated with improved pairing and TCR/CD3 stability. *Cancer Res* 66(17):8878-8886.
8. Parkhurst MR, *et al.* (1996) Improved induction of melanoma-reactive CTL with peptides from the melanoma antigen gp100 modified at HLA-A\*0201-binding residues. *J Immunol* 157(6):2539-2548.
9. Wooldridge L, *et al.* (2005) Interaction between the CD8 coreceptor and major histocompatibility complex class I stabilizes T cell receptor-antigen complexes at the cell surface. *J Biol Chem* 280(30):27491-27501.
10. Seynhaeve AL, *et al.* (2007) Tumor necrosis factor alpha mediates homogeneous distribution of liposomes in murine melanoma that contributes to a better tumor response. *Cancer Res* 67(19):9455-9462.
11. Ishiyama M, *et al.* (1996) A combined assay of cell viability and in vitro cytotoxicity with a highly water-soluble tetrazolium salt, neutral red and crystal violet. *Biol Pharm Bull* 19(11):1518-1520.
12. Du P, Kibbe WA, & Lin SM (2008) lumi: a pipeline for processing Illumina microarray. *Bioinformatics* 24(13):1547-1548.

**Figure S1**

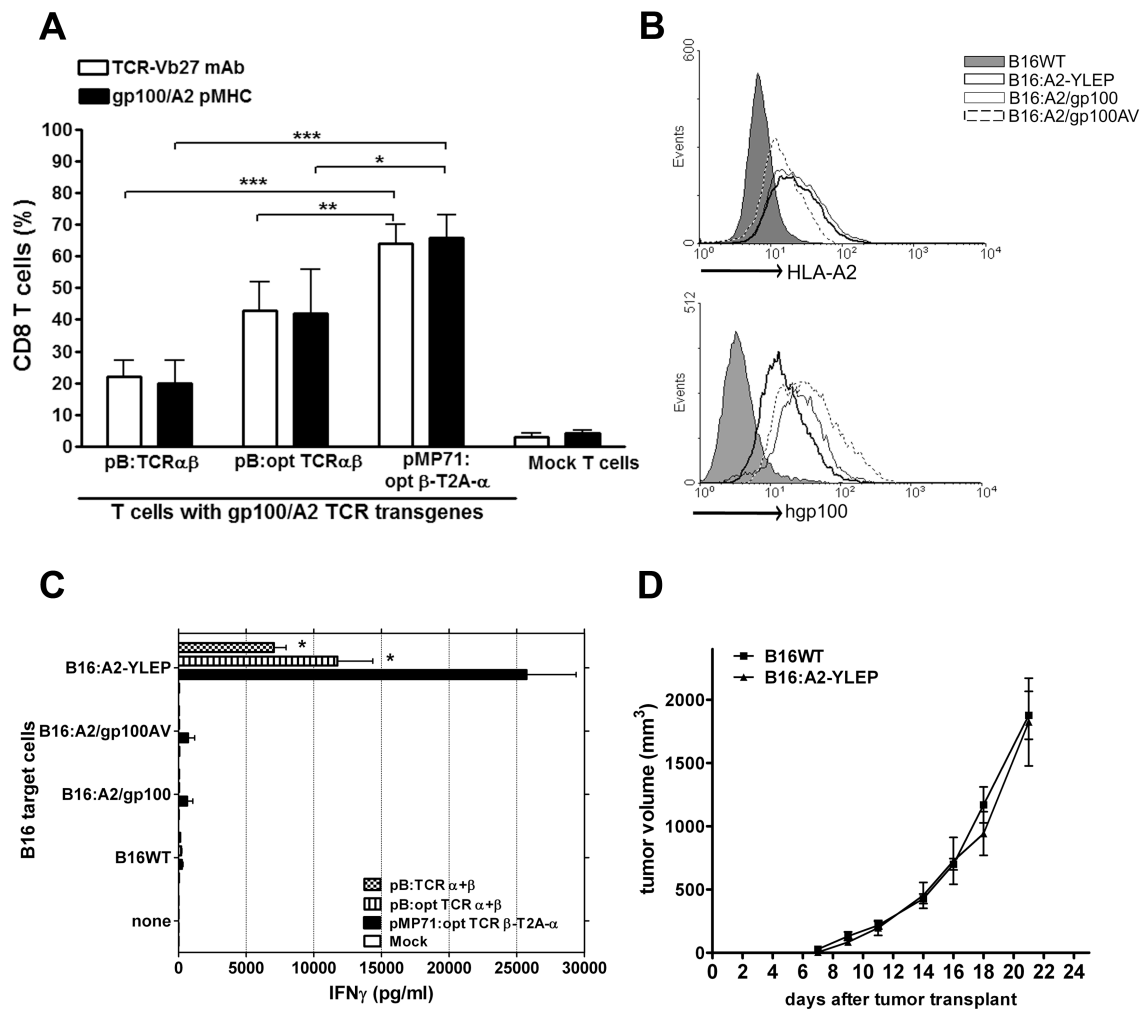

**Figure S1. Validation of TCR and antigen gene constructs**

(A) Murine splenocytes were transduced with the following gp100/A2 TCR constructs: pB:TCR $\alpha$ + $\beta$  (two separate pBullet vectors with wild type sequences for TCR $\alpha$  and TCR $\beta$ ); pB:optTCR $\alpha$ + $\beta$  (two separate pBullet vectors with codon optimized sequences for TCR $\alpha$  and TCR $\beta$ ); and pMP71:optTCR $\beta$ -T2A- $\alpha$  (single pMP71 vector with codon optimized TCR $\alpha$  $\beta$  in a T2A cassette). See *Supplementary text* for details on the construction of TCR genes. At day 5 following T cell activation CD8 T cells were analyzed for TCR-V $\beta$ 27 expression (white bars) and gp100/A2 pMHC binding (black bars) by flow cytometry. Data represent mean %  $\pm$  SEM, n=5 separate transductions. (B) B16 cells were transduced with the following gp100/A2 antigen constructs: pLXSN:A2+pLXSH:gp100 (B16:A2/gp100 cells, dashed histogram); pLXSN:A2+pLXSH:gp100AV (B16:A2/gp100AV cells, black histogram) and pLXSN:A2-

YLEP+pLXSH:gp100 (B16:A2-YLEP cells, bold black histogram). See *Supplementary text* for details on the construction of antigen genes. Tumor cells were stained with a FITC-labeled anti-HLA-A2 mAb, or anti-human gp100 mAb followed by a PE-labeled anti-mouse IgG and analyzed by flow cytometry. Non-transduced B16WT cells were used as a negative control (grey filled histogram). **(C)** TCR-transduced splenocytes (from S1A) were incubated with different populations of B16 target cells (from S1B) and supernatants were harvested after 20h and analyzed for murine IFN $\gamma$ . Data are presented as mean pg/ml IFN $\gamma$  + SEM, n=5. **(D)** B16:A2-YLEP or B16WT cells ( $0.5 \times 10^6$ ) were injected s.c. into HLA-A2 tg mice. Tumor volumes were measured 3 times a week with a caliper and data are presented as mean mm<sup>3</sup>  $\pm$  SEM, n=5. Statistical differences were calculated with Student's *t* tests: \*p<0.05, \*\*p<0.01, \*\*\* p<0.0001.

Figure S2

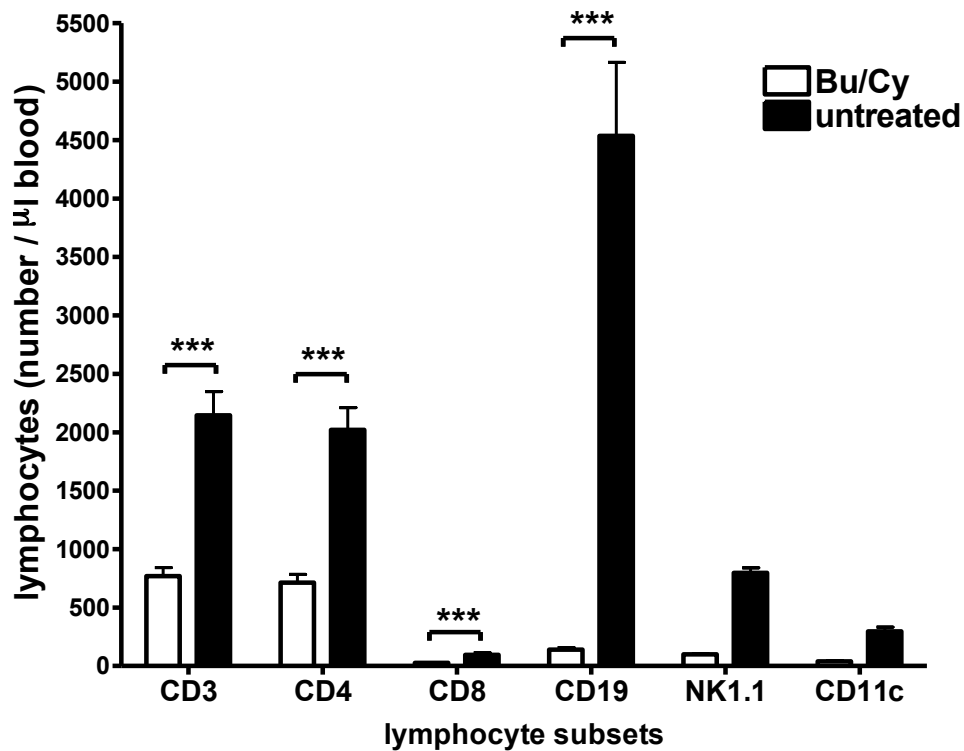

**Figure S2. Conditioning with Busulphan and Cyclophosphamide results in effective lymphodepletion *in vivo***

HLA-A2 tg mice were conditioned with Bu/Cy as described in the *Supplementary text* (n=24 mice, tumor-bearing, no T cell treatment). As a control, HLA-A2 tg mice were left untreated (n=8). Peripheral blood was collected one day after conditioning and analyzed for different lymphocyte subsets by flow cytometry (for NK1.1 and CD11c, n=2). Data are displayed as mean numbers  $\pm$  SEM. Statistical differences were calculated with Student's *t* tests.

\*\*\*p<0.0001.



**Figure S3**

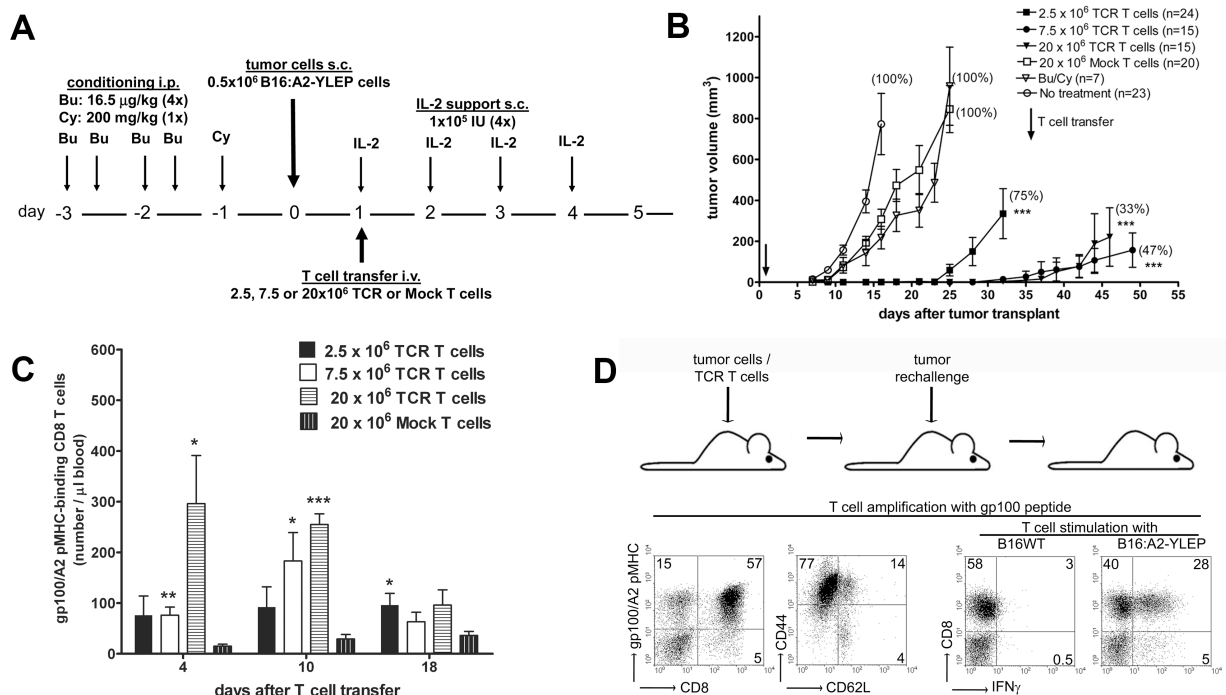

**Figure S3. Treatment with gp100/A2 TCR T cells prevents or delays tumor growth and results in the generation of antigen-specific memory T cells**

**(A)** Schedule of tumor prevention model: HLA-A2 tg mice were conditioned with a total of 4 Bu injections i.p., twice daily on 2 consecutive days, followed by a single Cy injection i.p. prior to transplantation of  $0.5 \times 10^6$  B16:A2-YLEP tumor cells s.c. at day 0. At day 1 mice were either injected i.v. with gp100/A2 TCR T cells ( $2.5, 7.5$  or  $20 \times 10^6$  T cells that bind gp100/A2 pMHC), Mock T cells (number of Mock T cells equal to number of T cells in  $20 \times 10^6$  TCR T cell group) or left untreated. T cell injection was followed by injections of IL-2 ( $1 \times 10^5$  IU per dose) s.c. on 4 consecutive days. **(B)** Tumor sizes were measured 3 times a week with a caliper. Data are presented as mean  $\text{mm}^3 \pm \text{SEM}$ . The percentages of mice that presented with a tumor are indicated in parentheses. **(C)** Peripheral blood was collected from mice at the indicated time points and absolute numbers of gp100/A2 pMHC-binding CD8 T cells were determined by flow cytometry. Data are presented as mean numbers  $\pm \text{SEM}$  (n=8). **(D)** Mice that remained tumor-free for  $> 90$  days after tumor challenge were re-challenged with B16:A2-YLEP cells (n=13). Tumor growth was delayed in all re-challenged mice when

compared to primary challenged mice and 30% of mice remained again tumor-free until the end of the experiment (> 90 days). Splenocytes of tumor-free mice were amplified *in vitro* in the presence of gp100 peptide and assessed for gp100/A2 pMHC-binding and expression of CD44 and CD62L. In addition, peptide- amplified cells were stimulated O/N in the presence of B16:A2-YLEP or B16WT cells and monitored for intracellular IFN $\gamma$  expression by CD8 T cells. Representative dot plots from 1 of 4 mice are shown and the % of cells in each quadrant is indicated. Statistical significances were calculated with Student's t-tests: \*  $p < 0.05$ , \*\*  $p < 0.005$ , \*\*\*  $p < 0.0001$ .

Figure S4

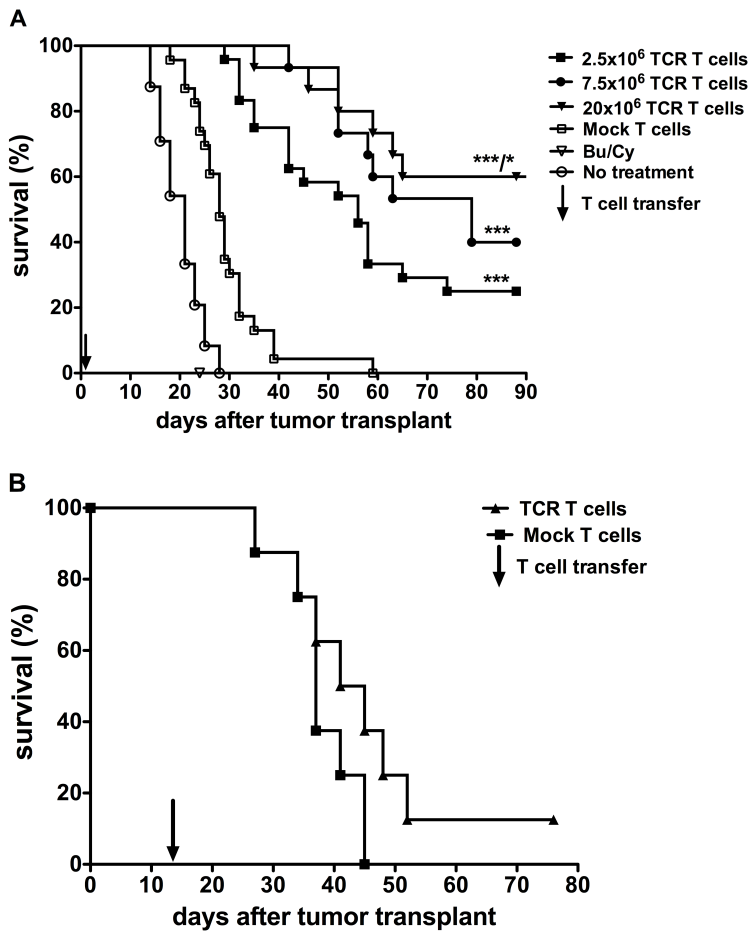

**Figure S4. TCR T cells provide a survival advantage in preventive but not curative model**

(A) HLA-A2 tg mice were treated as described in the legend to Figure S3A. (B) Mice were treated with 20x10<sup>6</sup> TCR or Mock T cells as described in the legend to Figure 1A. Statistical significances between TCR and Mock T cells and among different doses of TCR T cells were calculated with the Mantel-Cox test: \*\*\* p<0.0001 (preventive model, TCR vs Mock T cells); \* p<0.05 (preventive model, 20x10<sup>6</sup> vs 2.5x10<sup>6</sup> TCR T cells); and not significant (curative model, TCR vs Mock T cells; and preventive model, 20x10<sup>6</sup> vs 7.5x10<sup>6</sup> TCR T cells).

**Figure S5**

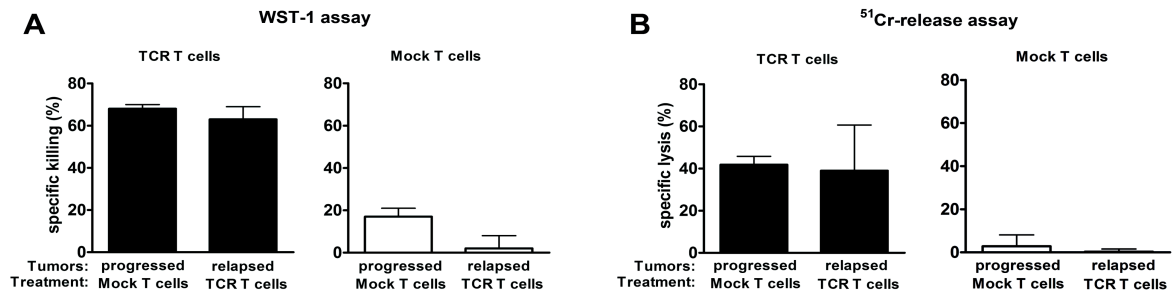

**Figure S5. Cells isolated from relapsed tumors are killed by TCR T cells *ex vivo***

HLA-A2 tg mice bearing established tumors from B16:A2-YLEP clone were conditioned and treated with TCR or Mock T cells as described in legend to Figure 1A. Following T cell treatment, mice with progressing (treated with Mock T cells) and relapsing (treated with TCR T cells) tumors were sacrificed when tumor sizes were maximal (the largest diameter reached 20 mm). Tumors were isolated, single cell suspensions were prepared and short-term cultures (4-7 days) were set up. Tumor cells were exposed to TCR or Mock T cells and target cell lysis was measured by (A) a WST-1 assay (effector-to-target (E:T) ratio of 8:1) and (B) a <sup>51</sup>Cr-release assay (E:T ratio of 40:1). Both assays were performed in triplicate and data are presented as mean % specific killing + SEM (n=8 individual tumors in A; and n=2 individual tumors in B).

**Figure S6**

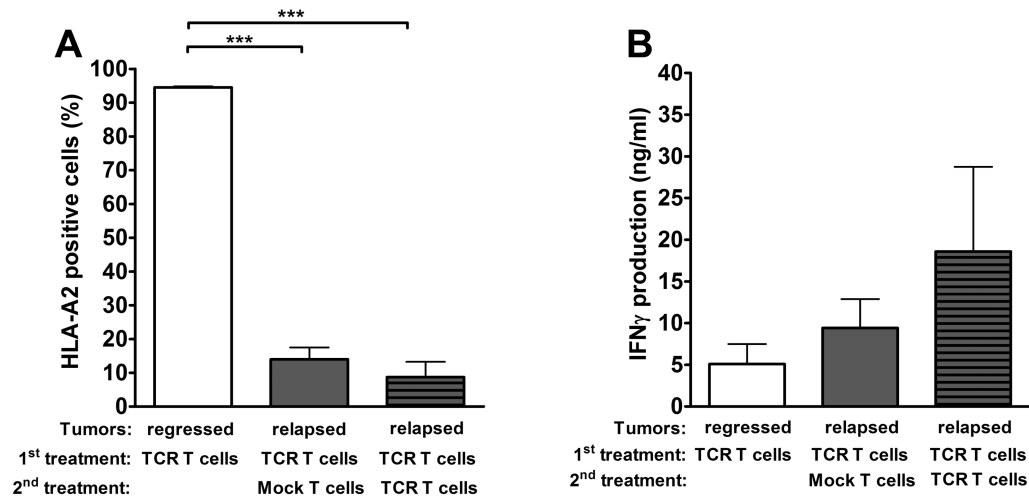

**Figure S6. Relapsed tumors that progress following a second T cell treatment have not lost expression of antigen**

HLA-A2 tg mice bearing relapsed B16:A2-YLEP tumors received a second treatment with either TCR or Mock T cells at day 34 (after tumor transplant). Mice bearing a B16:A2-YLEP tumor and receiving a first treatment with TCR T cells (day 14 after tumor transplant) served as controls. Mice were sacrificed, tumors were isolated, single cell suspensions were prepared and short-term cultures (4-7 days) were set up (n=3-5 mice per group). **(A)** Tumor cell HLA-A2 surface expression was measured by flow cytometry and data are presented as mean % positive cells in viable gate + SEM. **(B)** IFN $\gamma$  production by TCR T cells upon a 20h exposure to tumor cells *ex vivo* was analyzed by ELISA. Data are presented as mean ng/ml + SEM. Statistical significances were calculated with Student's t-tests: \*\*\*  $p < 0.0001$ . See legends to Figures 3B and C for details.

**Figure S7**

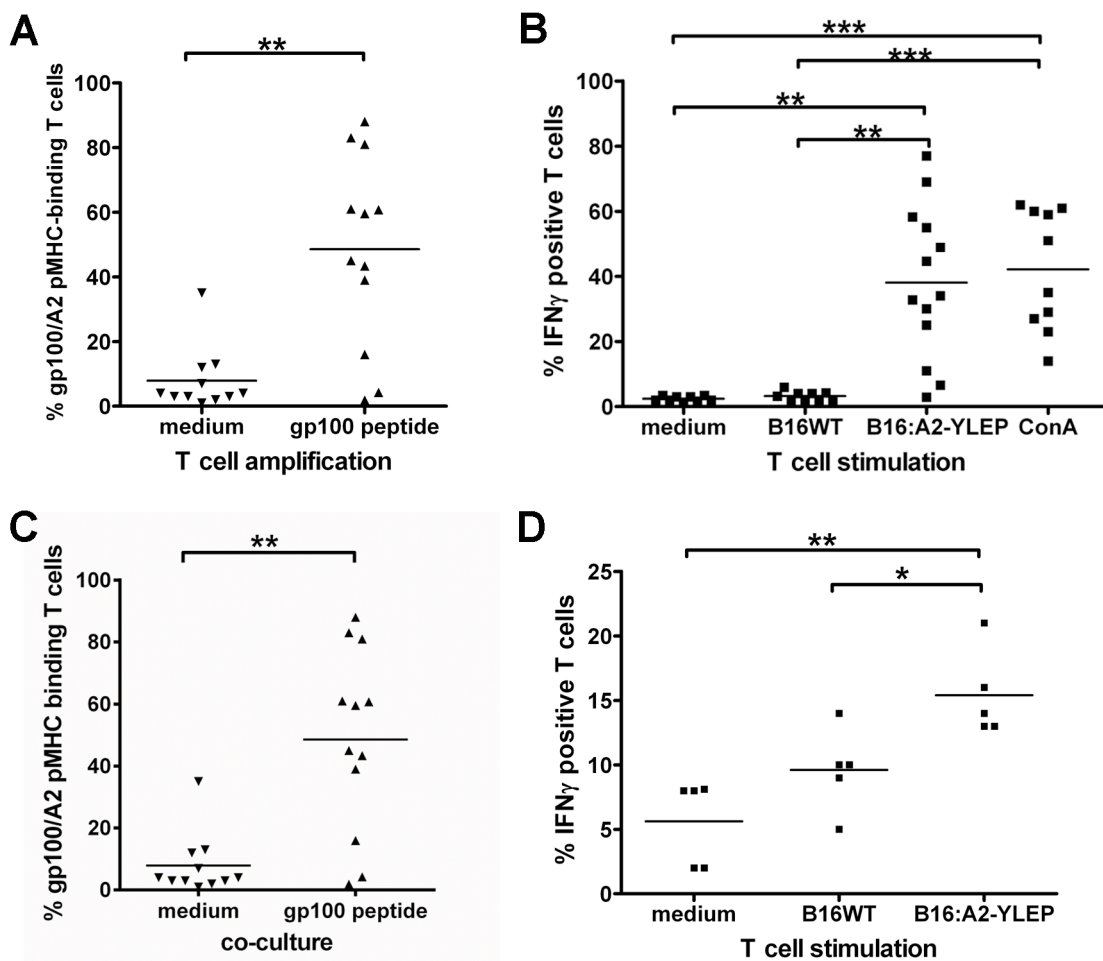

**Figure S7. T cell responses in cured mice are not directed against tumor antigens other than the target antigen**

**(A-D)** B16:A2-YLEP tumor bearing mice were treated as described in the legend to Figure 1A. **(A)** Splenocytes from cured mice were cultured in the presence or absence of gp100 peptide for 5-7 days and analyzed for the % of gp100/A2 pMHC-binding T cells by flow cytometry. **(B)** Splenocytes amplified in the presence of gp100 peptide were stimulated *in vitro* with B16WT or B16:A2-YLEP cells for 20h and analyzed for IFN $\gamma$  production by flow cytometry. Stimulations with medium and Concanavalin A were used as negative and positive controls, respectively. **(C)** Splenocytes from cured mice were also amplified in the presence of B16:A2-YLEP cells for 7 days and analyzed for the % of gp100/A2 pMHC-binding T cells by flow cytometry. **(D)** Splenocytes amplified in the presence of B16:A2-YLEP cells were also stimulated *in vitro* with B16WT or B16:A2-YLEP cells for 20h and analyzed

for IFN $\gamma$  production by flow cytometry. IFN $\gamma$  responses were defined positive in case T cells demonstrated at least 10% binding of gp100/A2 pMHC and a % that stained positive for IFN $\gamma$  that was at least 2.5 fold higher compared to medium-stimulated T cells. Concanavalin A responses ranged between 35 and 60% IFN $\gamma$ -positive T cells (not shown). Each dot represents an individual mouse with lines indicating mean % pMHC binding or IFN $\gamma$  staining. Statistical significances were calculated with Student's t-tests: \* p< 0.05, \*\* p<0.005, \*\*\* p<0.0001.

Figure S8

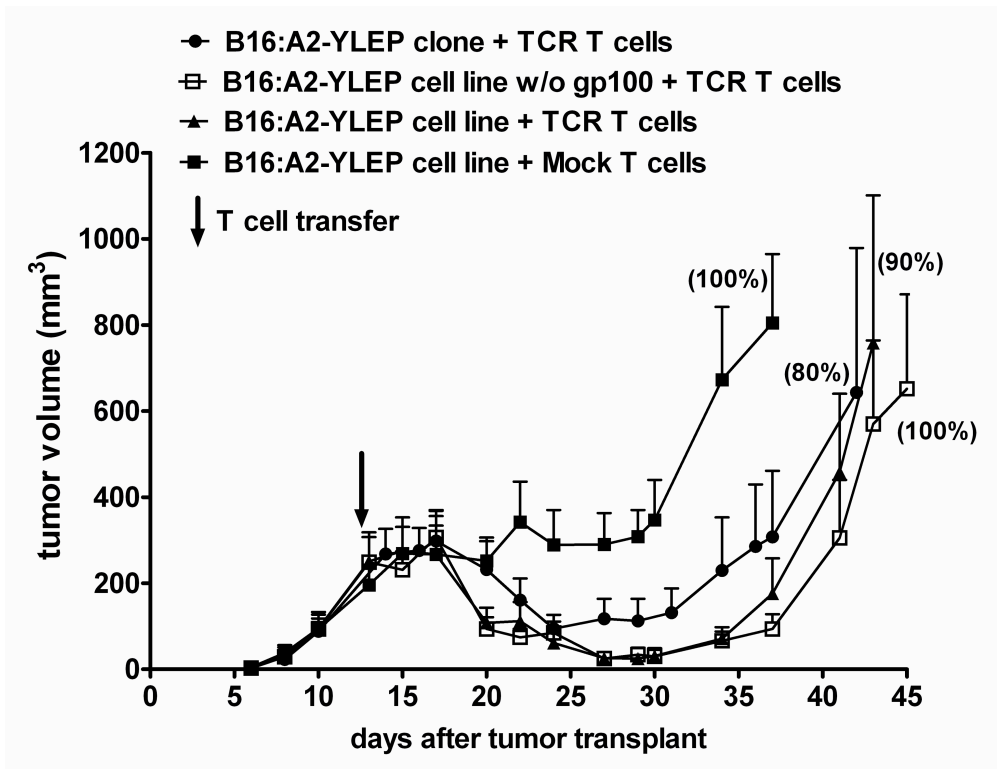

**Figure S8. Frequency and kinetics of tumor relapse are neither affected by presence of antigen-negative tumor cells nor cross-presentation of gp100 antigen**

HLA-A2 tg mice were transplanted either with a B16:A2-YLEP cell line that expresses wild type gp100 protein (B16:A2-YLEP) or a B16:A2-YLEP cell line or clone that does not express wild type gp100 protein (B16:A2-YLEP w/o gp100 or B16:A2-YLEP clone, respectively).

Once tumors were established, mice were conditioned and received  $20 \times 10^6$  TCR or Mock T cells (see legend to Figure 1A). Tumor sizes were measured 3 times a week with a caliper.

Data are expressed as mean mm<sup>3</sup>  $\pm$  SEM, n=8, and % of mice with tumor relapse are indicated in parentheses.



Figure S9

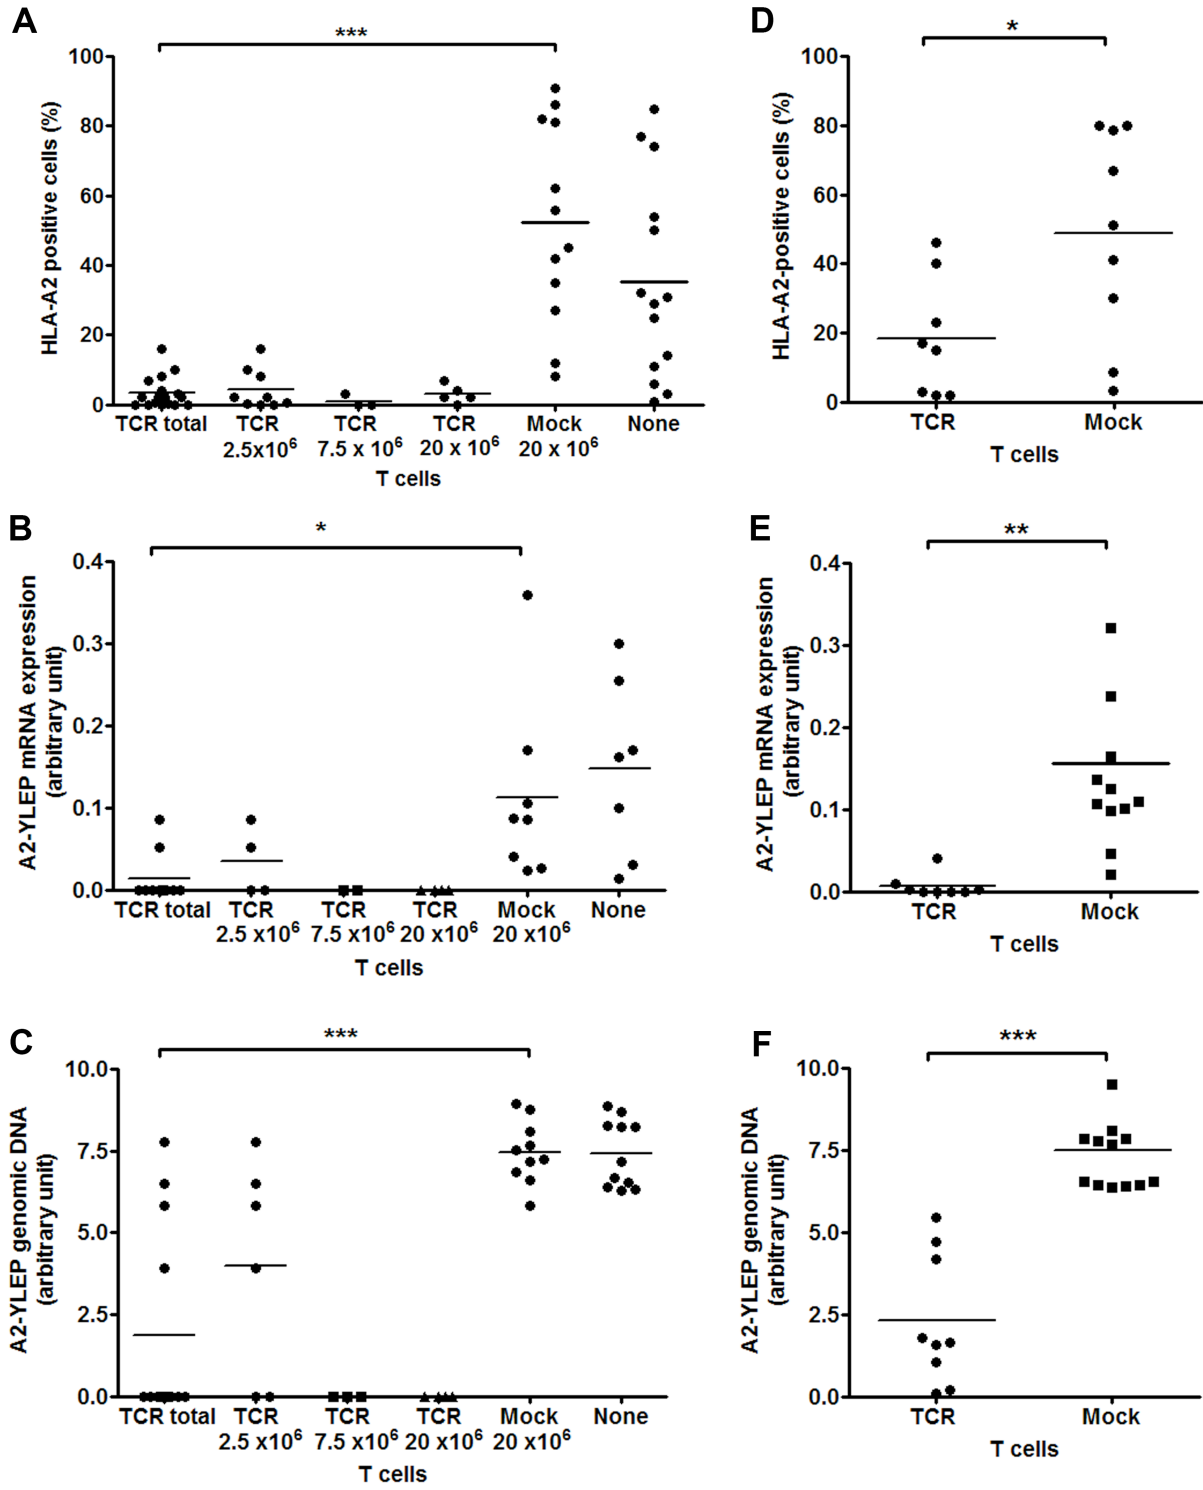

### **Figure S9. TCR T cells select for tumors that lack antigen DNA**

HLA-A2 tg mice were conditioned, transplanted with tumor cells and treated with T cells as described in the legend to Figure S3A (preventive model: **A-C**) or Figure 1A (curative model: **D-F**). Tumors were either treated with TCR T cells (analyzed as a total group or per individual dosis), Mock T cells or not treated. Under conditions where tumor diameters  $\geq 20$  mm, mice were sacrificed, tumors were isolated and single cell suspensions were prepared. (**A** and **D**) HLA-A2 surface expression was measured by flow cytometry and data are presented as % positive cells in viable gate. Horizontal lines represent mean % in each treatment group. Levels of (**B** and **E**) mRNA and (**C** and **F**) genomic DNA were measured by quantitative PCR and data are presented relative to the expression level of the endogenous reference gene TRP2, with lines representing mean levels of mRNA or DNA in each treatment group. Statistical significances were calculated with Student's t-tests: \* $p < 0.05$ , \*\* $p < 0.005$ , and \*\*\* $p < 0.0001$ . Note that individual points do not necessarily reflect identical mice and TCR and Mock T cell-treated mice should be analyzed as a group rather than individually.

**Figure S10**

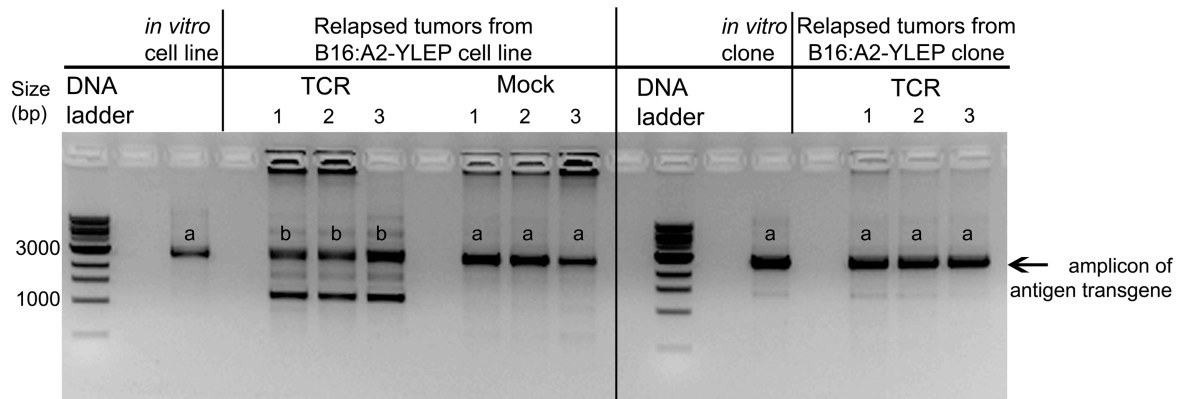

(a) band:

```

|Leader HLA-A2
|ATGGCCGTCATGGCGCCCCGAACCCTCGTCCTGCTACTCTCGGGGGCTCTGGCCCTGACCCCAGACC
|YLEPGPTVTA peptide (G4S)3 linker
|TGGGCG |TACCTGGAGCCTGGCCCAGTCACTGC |CGGAGGTGGCGGATCCGGCGGAGGCGGCTCGGG
|Human β2m
TGGCGGCGGCTCTGGA |ATCCAGCGTACTCCAAAGATTCAGGTTTACTCACGTCATCCAGCAGAGAA
    
```

underlined: A2-YLEP-specific forward primer, reverse primer and probe

(b) band:

```

|Leader HLA-A2
|AGGCCGTCATGGCGCCCCGAACCCTCGTCCTGCTACTCTCGGGGGCTCTGGCCCTGACCCCAGACC
|Human β2m
|TGGGCG |ATCCAGCGTACTCCAAAGATTCAGGTTTACTCACGTCATCCAGCAGAGAA
    
```

underlined: A2-specific forward primer, reverse primer and probe

**Figure S10. Antigen-negative cells in relapsed tumors originate from antigen-negative cells already present in pre-treatment tumors**

Relapsed tumors were derived from either B16:A2-YLEP cell lines or clones and used to assess antigen gene levels. PCR was performed to amplify retrovirally introduced A2-YLEP DNA using primers specific for pLXSN flanking sequences (see *Supplementary text*). Upper part: products were subjected to gel electrophoresis and dominant bands (termed: (a) and (b) bands, indicated by an arrow) were sequenced. The (b) band, present in relapsed tumors derived from B16:A2-YLEP cell line contained HLA-A2 (A2) without the YLEPGPTVTA peptide and (G<sub>4</sub>S)<sub>3</sub> linker DNA (i.e., 1448 bp A2 + 1329 bp retroviral sequence = 2777 bp), whereas the (a) band, present in relapsed tumors derived from B16:A2-YLEP clone contained A2-YLEP DNA (i.e., 1523 bp A2-YLEP + 1329 bp retroviral sequence = 2852 bp). Tumors

treated with Mock T cells or *in vitro* cultures of B16:A2-YLEP cell line or clone, all contained the (a) band with A2-YLEP. Note that the lower bands, only present in relapsed tumors derived from B16:A2-YLEP cell line, were non-specific and did not contain A2 sequences. Shown are 3 representative samples of cell line-derived tumors treated with TCR (n=9) and Mock T cells (n=12), and clone-derived tumors treated with TCR T cells (n=3). Lower part: complete sequences of (a) and (b) bands indicating the position of leader, peptide, linker and  $\beta$ 2m domains, and primers/probes used to distinguish between A2-YLEP and A2 DNAs.

**Figure S11**

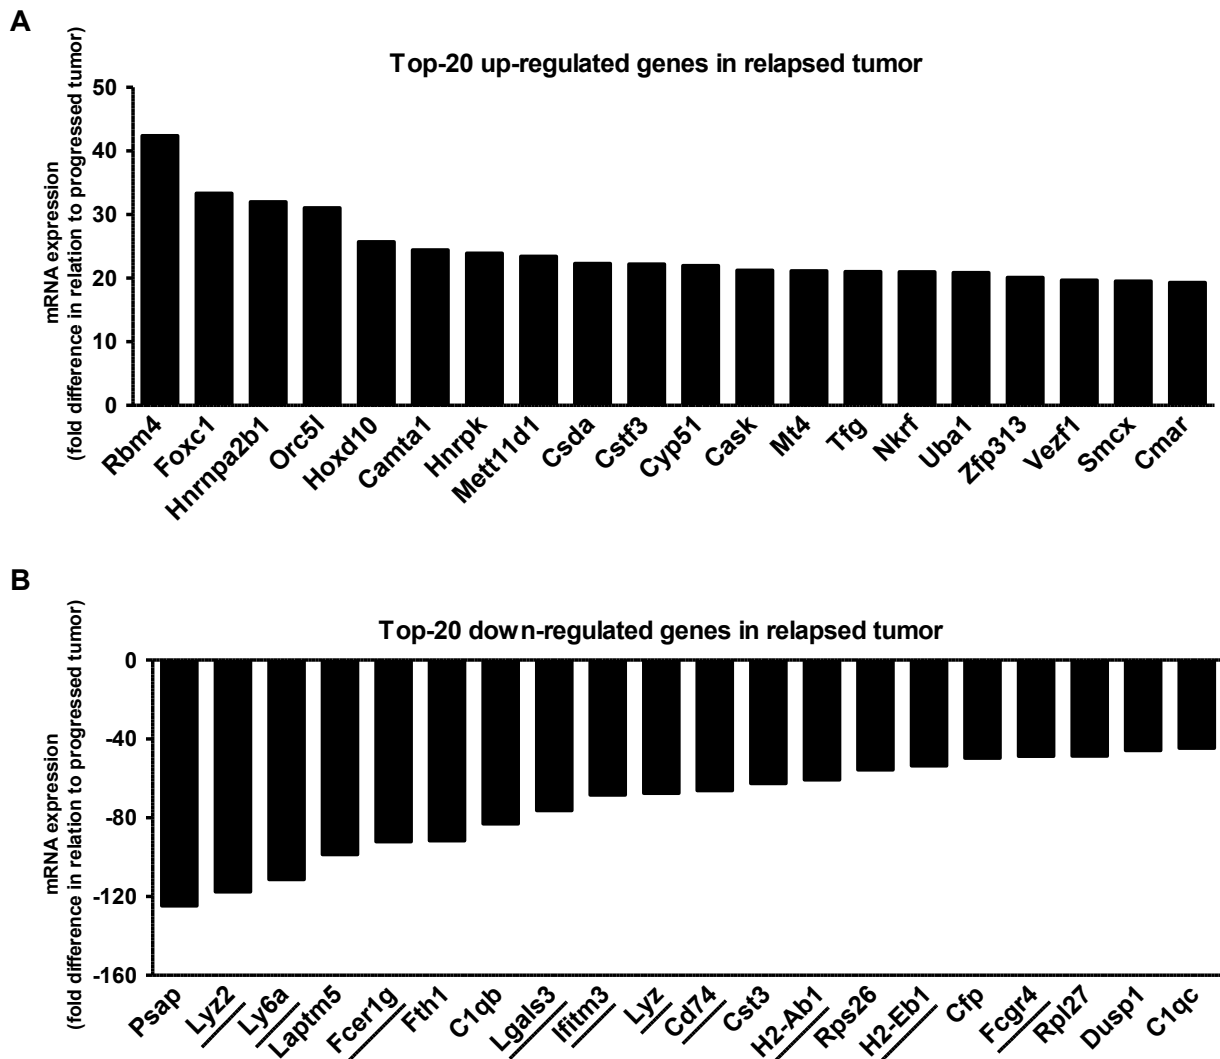

**Figure S11. Ranking of genes that are most differentially expressed in relapsed tumors**

Tumors were collected and used for RNA isolation, after which RNA was processed and analyzed for genome-wide expression analysis (see legend to Figure 5). A total set of 24,000 genes was analyzed for differential expression in relapsed tumors (see *Supplementary text* for details). Figures (A) and (B) present twenty genes that are ranked according the highest fold increase (up-regulated genes) or decrease (down-regulated genes) in expression in relapsed versus regressed tumors. Calculations were based on mean values, n=3, per tumor type (see legend to Figure 3A for a description of regressed and relapsed tumors). Genes are annotated according to [www.genecards.org](http://www.genecards.org). Genes that are related to immunity according to gene ontology analyses are underlined. Statistical significances were calculated with Sign t-tests: \* p< 0.05.

**Figure S12**

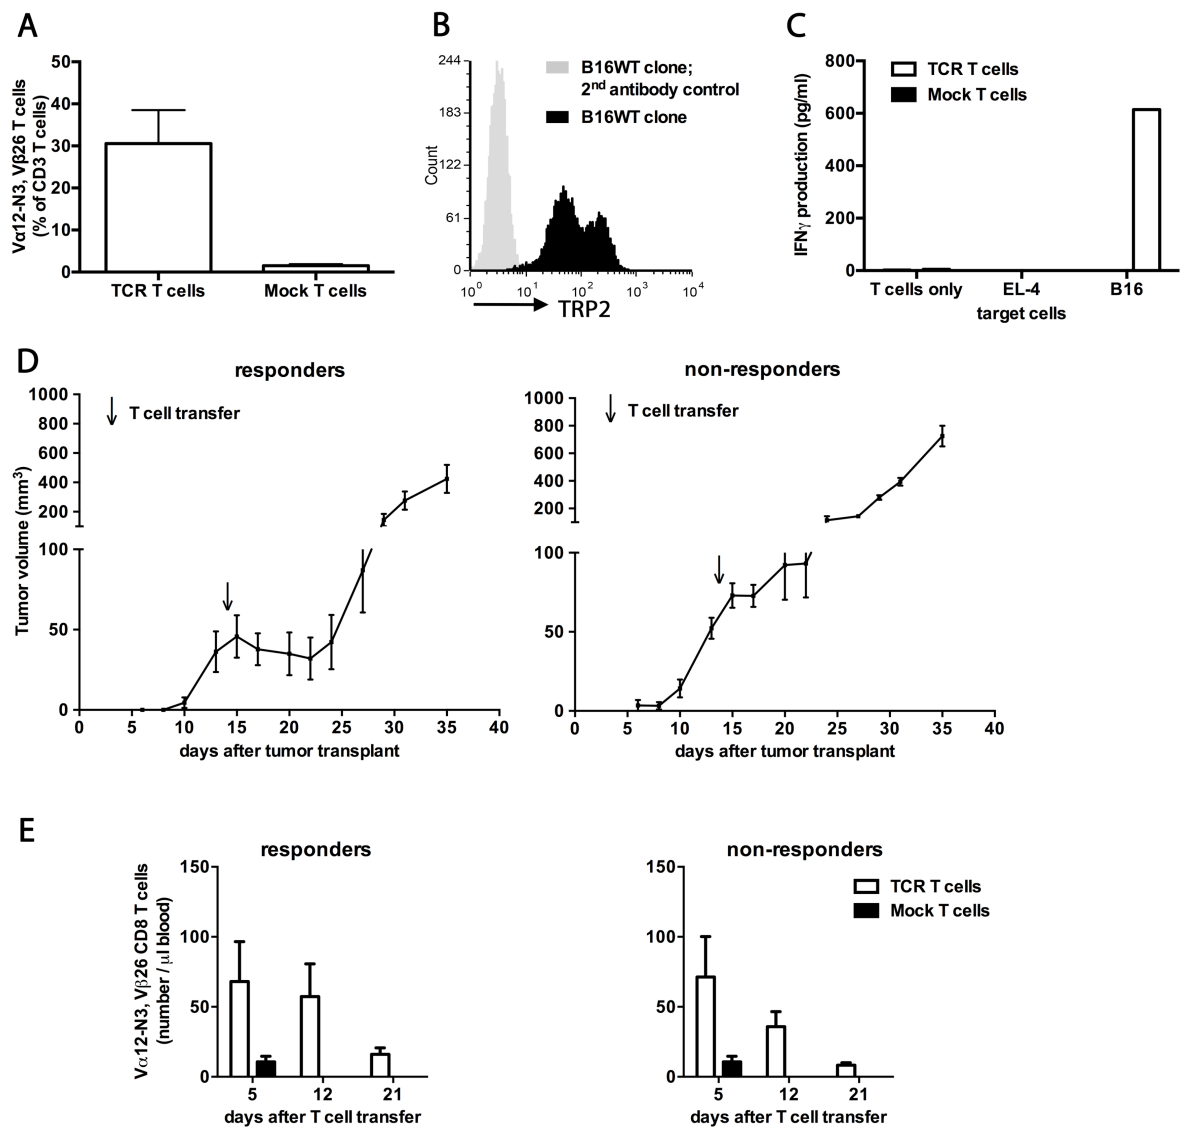

**Figure S12. Validation of TRP2 TCR in vitro and in vivo**

(A) Murine splenocytes from B6 WT mice were transduced with a TRP2/H2-K<sup>b</sup> TCR. See *Supplementary text* for details on the construction of TCR vectors. At day 5 following T cell activation CD8 T cells were analyzed for TCR-Vα12N-3 and TCR-Vβ26 expression by flow cytometry. Data represent mean % ± SEM, n=3 separate transductions. (B) B16WT clone was stained with anti-TRP2 mAb followed by a PE-labeled anti-goat Ig (H+L) and analyzed by flow cytometry (histogram with solid line). B16WT cells stained with the secondary Ig only were used as a negative control (grey histogram). (C) TRP2/H2-K<sup>b</sup> TCR-transduced splenocytes (from S12A) were incubated with B16WT and the TRP2 negative mouse tumor cell line EL4. Supernatants were harvested after 20h and analyzed for murine IFNγ. A

representative experiment out of 3 is shown and data are presented as pg/ml IFN $\gamma$  (**D**) B6 mice bearing established B16WT tumors were treated as described in legend to Figure 7. Treatment with TCR T cells resulted in a decrease in tumor size of  $\geq 30\%$  relative to the day of T cell treatment in 70% of mice (responders, n=9), and less or no decrease in tumor size in 30% of mice (non-responders, n=4). Tumor sizes were measured and presented as described in legend to Figure 1A. (**E**) Peripheral blood was collected from mice in Figure S12D at the indicated time points and absolute numbers of TCR-V $\alpha$ 12N-3, TCR-V $\beta$ 26 CD8 T cells were determined by flow cytometry. Data are presented as mean numbers  $\pm$  SEM.
